# Supplementary material
Source: MDPI journal article supplement (https://www.mdpi.com/search?q=molbank-2021-M1261)
Supplement: s002 [file molbank-2021-M1261-s002.mol]

compound_2.mol
  ChemDraw06252111052D

 29 29  0  0  0  0  0  0  0  0999 V2000
   -0.8698    0.7665    0.0000 C   0  0  0  0  0  0  0  0  0  0  0  0
   -0.0448    0.7665    0.0000 C   0  0  0  0  0  0  0  0  0  0  0  0
    0.3677    0.0520    0.0000 N   0  0  0  0  0  0  0  0  0  0  0  0
    1.1927    0.0520    0.0000 C   0  0  0  0  0  0  0  0  0  0  0  0
    1.6052    0.7665    0.0000 C   0  0  0  0  0  0  0  0  0  0  0  0
    1.1927    1.4810    0.0000 C   0  0  0  0  0  0  0  0  0  0  0  0
    0.3677    1.4810    0.0000 C   0  0  0  0  0  0  0  0  0  0  0  0
   -1.2823    1.4810    0.0000 C   0  0  0  0  0  0  0  0  0  0  0  0
   -2.1073    1.4810    0.0000 C   0  0  0  0  0  0  0  0  0  0  0  0
   -2.5198    0.7665    0.0000 C   0  0  0  0  0  0  0  0  0  0  0  0
   -2.1073    0.0520    0.0000 C   0  0  0  0  0  0  0  0  0  0  0  0
   -1.2823    0.0520    0.0000 N   0  3  0  0  0  0  0  0  0  0  0  0
   -0.8354   -0.7312    0.0000 H   0  0  0  0  0  0  0  0  0  0  0  0
   -2.5184    2.1930    0.0000 C   0  0  0  0  0  0  0  0  0  0  0  0
   -2.9295    2.9051    0.0000 C   0  0  0  0  0  0  0  0  0  0  0  0
   -2.1073    2.9051    0.0000 C   0  0  0  0  0  0  0  0  0  0  0  0
   -3.3406    2.1930    0.0000 C   0  0  0  0  0  0  0  0  0  0  0  0
    1.6038    2.1930    0.0000 C   0  0  0  0  0  0  0  0  0  0  0  0
    1.1927    2.9051    0.0000 C   0  0  0  0  0  0  0  0  0  0  0  0
    2.0149    2.9051    0.0000 C   0  0  0  0  0  0  0  0  0  0  0  0
    2.4261    2.1930    0.0000 C   0  0  0  0  0  0  0  0  0  0  0  0
    2.5156   -1.2551    0.0000 O   0  0  0  0  0  0  0  0  0  0  0  0
    2.5156   -2.0801    0.0000 S   0  0  0  0  0  0  0  0  0  0  0  0
    2.5156   -2.9051    0.0000 O   0  0  0  0  0  0  0  0  0  0  0  0
    1.6906   -2.0801    0.0000 C   0  0  0  0  0  0  0  0  0  0  0  0
    3.3406   -2.0801    0.0000 O   0  5  0  0  0  0  0  0  0  0  0  0
    1.2781   -1.3656    0.0000 F   0  0  0  0  0  0  0  0  0  0  0  0
    0.8656   -2.0801    0.0000 F   0  0  0  0  0  0  0  0  0  0  0  0
    1.2781   -2.7946    0.0000 F   0  0  0  0  0  0  0  0  0  0  0  0
  1  2  1  0      
  2  3  2  0      
  3  4  1  0      
  4  5  2  0      
  5  6  1  0      
  6  7  2  0      
  7  2  1  0      
  1  8  2  0      
  8  9  1  0      
  9 10  2  0      
 10 11  1  0      
 11 12  2  0      
 12  1  1  0      
  9 14  1  0      
  6 18  1  0      
 12 13  1  0      
 14 15  1  0      
 14 16  1  0      
 14 17  1  0      
 18 19  1  0      
 18 20  1  0      
 18 21  1  0      
 22 23  2  0      
 23 24  2  0      
 23 25  1  0      
 23 26  1  0      
 25 27  1  0      
 25 28  1  0      
 25 29  1  0      
M  CHG  2  12   1  26  -1
M  END
